# Supplementary material for: Differential expression of microRNAs contributed to the health efficacy of EGCG inin vitrosubarachnoid hemorrhage model
Source: Royal Society of Chemistry journal article supplement (doi:10.1039/c7fo01064h), 2017-01-01
Supplement: c7fo01064h3.pdf [file c7fo01064h3.pdf]

Table S1. Basic characteristics in the four libraries with and without EGCG

| Sample         | Control | SAH     | EGCG (1 $\mu$ M) | EGCG (50 $\mu$ M) |
|----------------|---------|---------|------------------|-------------------|
| Raw reads      | 7847243 | 7800374 | 7261096          | 8412576           |
| Q20            | 98.61%  | 98.23%  | 98.48%           | 98.53%            |
| Q30            | 95.90%  | 95.11%  | 95.57%           | 95.65%            |
| GC content (%) | 47.44%  | 46.73%  | 48.20%           | 48.10%            |

Q20, Q30, GC content were used to evaluate the quality

Table S2. Statistical summary of the data generated by high-throughput small-RNA sequencing after EGCG pre-treatment

| Read type               | sRNA libraries  |                 |                  |                   |
|-------------------------|-----------------|-----------------|------------------|-------------------|
|                         | Control         | SAH             | EGCG (1 $\mu$ M) | EGCG (50 $\mu$ M) |
| Low quality reads       | 8195 (0.1%)     | 10406 (0.13%)   | 7519 (0.1%)      | 10612 (0.13%)     |
| N% > 10%                | 652 (0.01%)     | 1005 (0.01%)    | 617 (0.01%)      | 674 (0.01%)       |
| 5' adapter contaminants | 277 (0.00%)     | 310 (0.00%)     | 3056 (0.04%)     | 3308 (0.04%)      |
| 3' adapter null         | 166663 (2.12%)  | 152129 (1.95%)  | 255655 (3.52%)   | 232659 (2.77%)    |
| Poly (A/T/G/C)          | 4851 (0.06%)    | 4433 (0.06%)    | 8066 (0.11%)     | 7842 (0.09%)      |
| Clean reads             | 7666605(97.70%) | 7632091(97.84%) | 6986183(96.21%)  | 8157481(96.97%)   |

N% means undetectable gaps at base calling

Table S3. Statistics of mapped sRNA reads in the four libraries after EGCG pre-treatment

| Category        | Total sRNAs    | Mapped sRNA      | '+' Mapped sRNA  | '-' Mapped sRNA |
|-----------------|----------------|------------------|------------------|-----------------|
| Con             | 7433820 (100%) | 4911847 (66.07%) | 4548254 (61.18%) | 363593 (4.89%)  |
| SAH             | 7524170 (100%) | 4242974 (56.39%) | 4033673 (53.61%) | 209301 (2.78%)  |
| EGCG 1 $\mu$ M  | 6714013 (100%) | 3638355 (54.19%) | 3298998 (49.14%) | 339457 (5.06%)  |
| EGCG 50 $\mu$ M | 7875625 (100%) | 4283201(54.39%)  | 3879588 (49.26%) | 403613 (5.12%)  |

'+' means that the reads align to genome with the same direction, whereas '-' means that the reads reversely align to genome.

Table S4. The detail of identified mapped small RNA after EGCG pre-treatment

| Read type              | Control | SAH     | EGCG    | EGCG50  |
|------------------------|---------|---------|---------|---------|
| total                  | 4911847 | 4242974 | 3638455 | 4283201 |
| mapped sRNAs           | 4445953 | 3965322 | 3284218 | 3963937 |
| Novel sRNAs            | 1209    | 695     | 864     | 984     |
| rRNAs                  | 2852    | 1932    | 8554    | 3076    |
| tRNAs                  | 2       | 0       | 2       | 3       |
| snRNAs                 | 1978    | 1527    | 3955    | 2666    |
| snoRNAs                | 65522   | 24222   | 28803   | 29941   |
| repeat associated RNAs | 45142   | 31982   | 50640   | 52919   |
| Other                  | 111135  | 90566   | 83086   | 88018   |

Table S5. The summary of down-regulated and up-regulated miRNAs targeting p38 MAPK after EGCG pre-treatment

| Group             | Downregulated miRNA expression                                               | Upregulated miRNA expression                                                                                                                                                                                                                                                                                     |
|-------------------|------------------------------------------------------------------------------|------------------------------------------------------------------------------------------------------------------------------------------------------------------------------------------------------------------------------------------------------------------------------------------------------------------|
| SAH               | rno-miR-378a-3p, rno-miR-204-3p, rno-miR-152-5p, rno-miR-3557-5p             | rno-miR-16-5p, rno-miR-93-5p, rno-miR-125b-5p, rno-miR-195-5p                                                                                                                                                                                                                                                    |
| EGCG (1 $\mu$ M)  | rno-miR-22-3p, rno-miR-24-3p, rno-miR-193b-3p, rno-miR-192-5p, rno-miR-22-5p | rno-miR-125a-5p, rno-miR-125b-5p, rno-miR-93-5p, rno-miR-195-5p, rno-miR-20a-5p, rno-miR-17-5p, rno-miR-107-3p, rno-miR-106b-5p, rno-miR-15b-5p, rno-miR-497-5p, rno-miR-505-3p, rno-miR-674-5p, rno-miR-200a-3p, rno-miR-19b-3p, rno-miR-324-3p, rno-miR-204-3p, rno-miR-465-3p, rno-miR-883-3p,                |
| EGCG (50 $\mu$ M) | rno-miR-204-5p, rno-miR-192-5p                                               | rno-miR-26b-3p<br>rno-miR-19b-3p, rno-miR-26b-3p, rno-miR-204-3p, rno-miR-20a-5p, rno-miR-195-5p, rno-miR-125a-5p, rno-miR-125b-5p, rno-miR-324-3p, rno-miR-497-5p, rno-miR-106b-5p, rno-miR-93-5p, rno-miR-17-5p, rno-miR-465-3p, rno-miR-16-5p, rno-miR-15b-5p, rno-miR-505-3p, rno-miR-883-3p, rno-miR-674-5p |
