# Supplementary figures and images for: Differential expression of microRNAs contributed to the health efficacy of EGCG inin vitrosubarachnoid hemorrhage model
Source: Royal Society of Chemistry journal article supplement (doi:10.1039/c7fo01064h), 2017-01-01

# Pearson correlation between samples

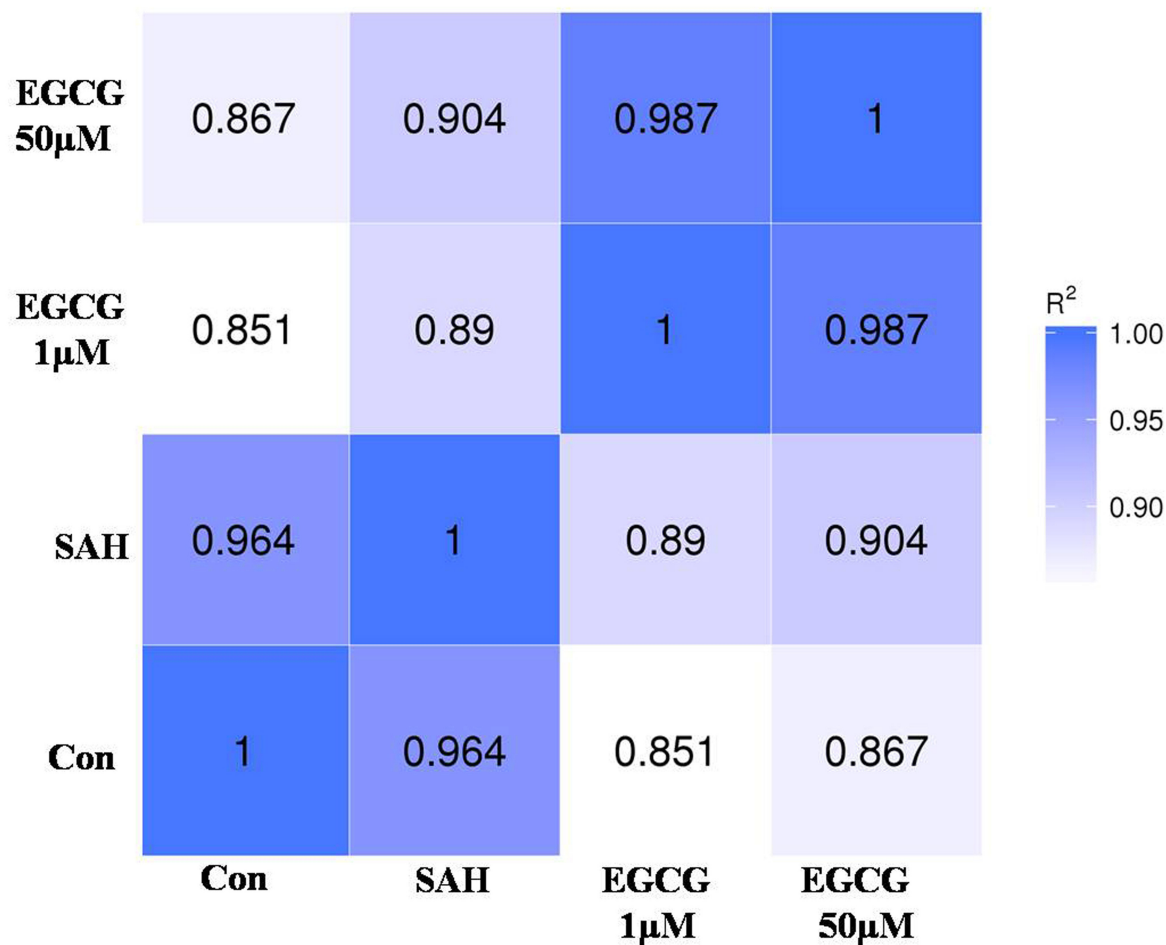

Supplement: c7fo01064h2.pdf [file c7fo01064h2.pdf]
